# Supplementary material
Source: PubMed Central journal article supplement (PMC3898888)

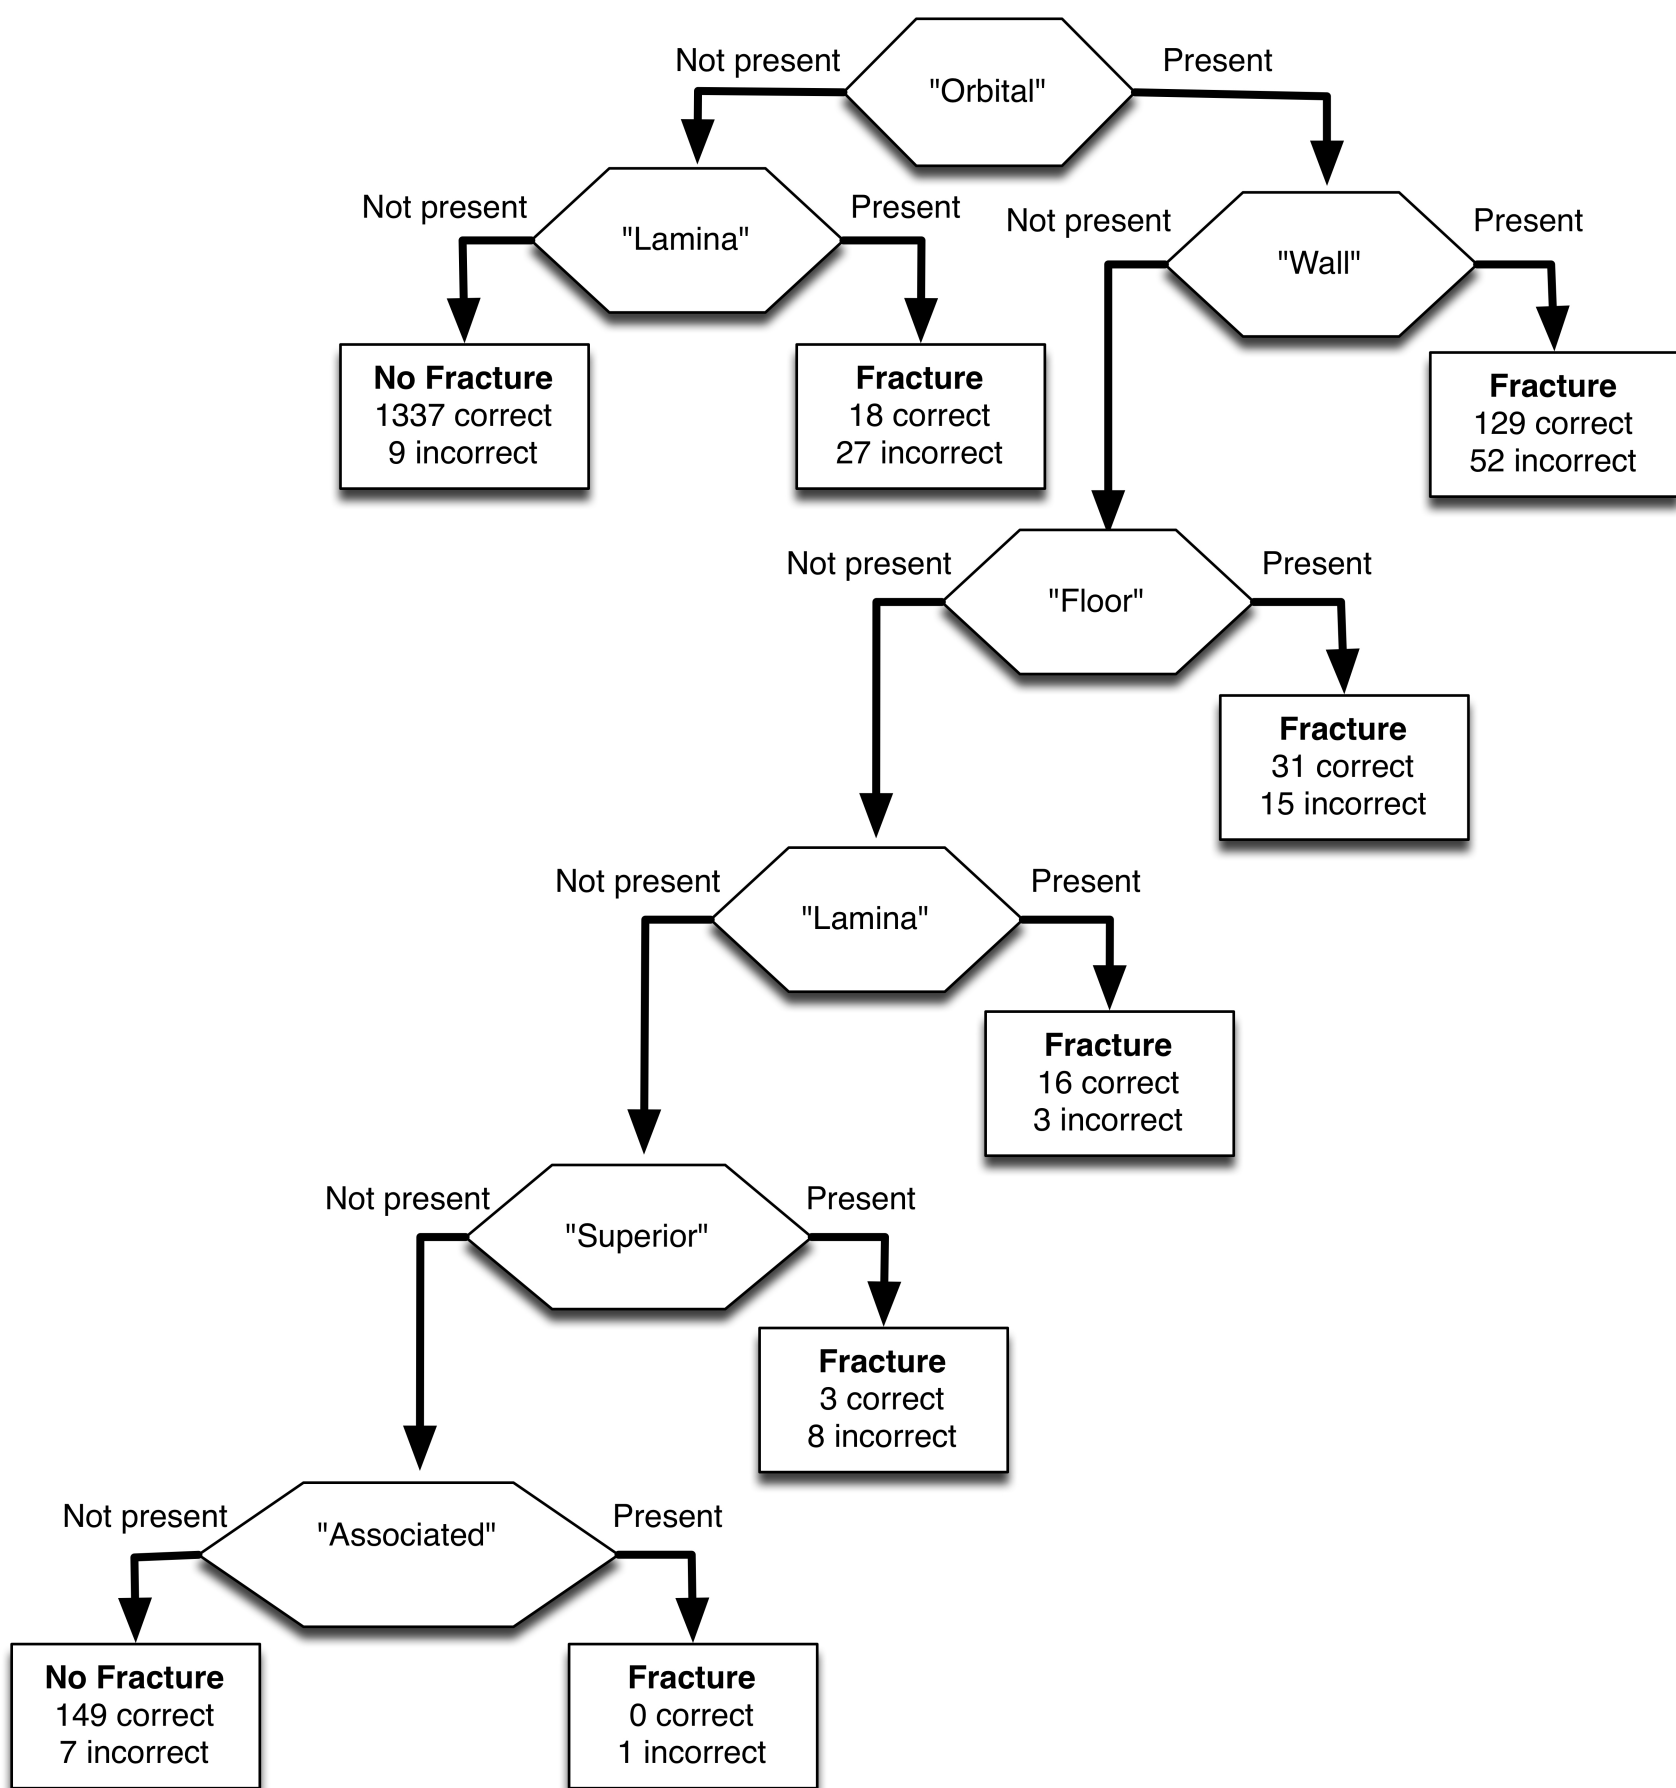

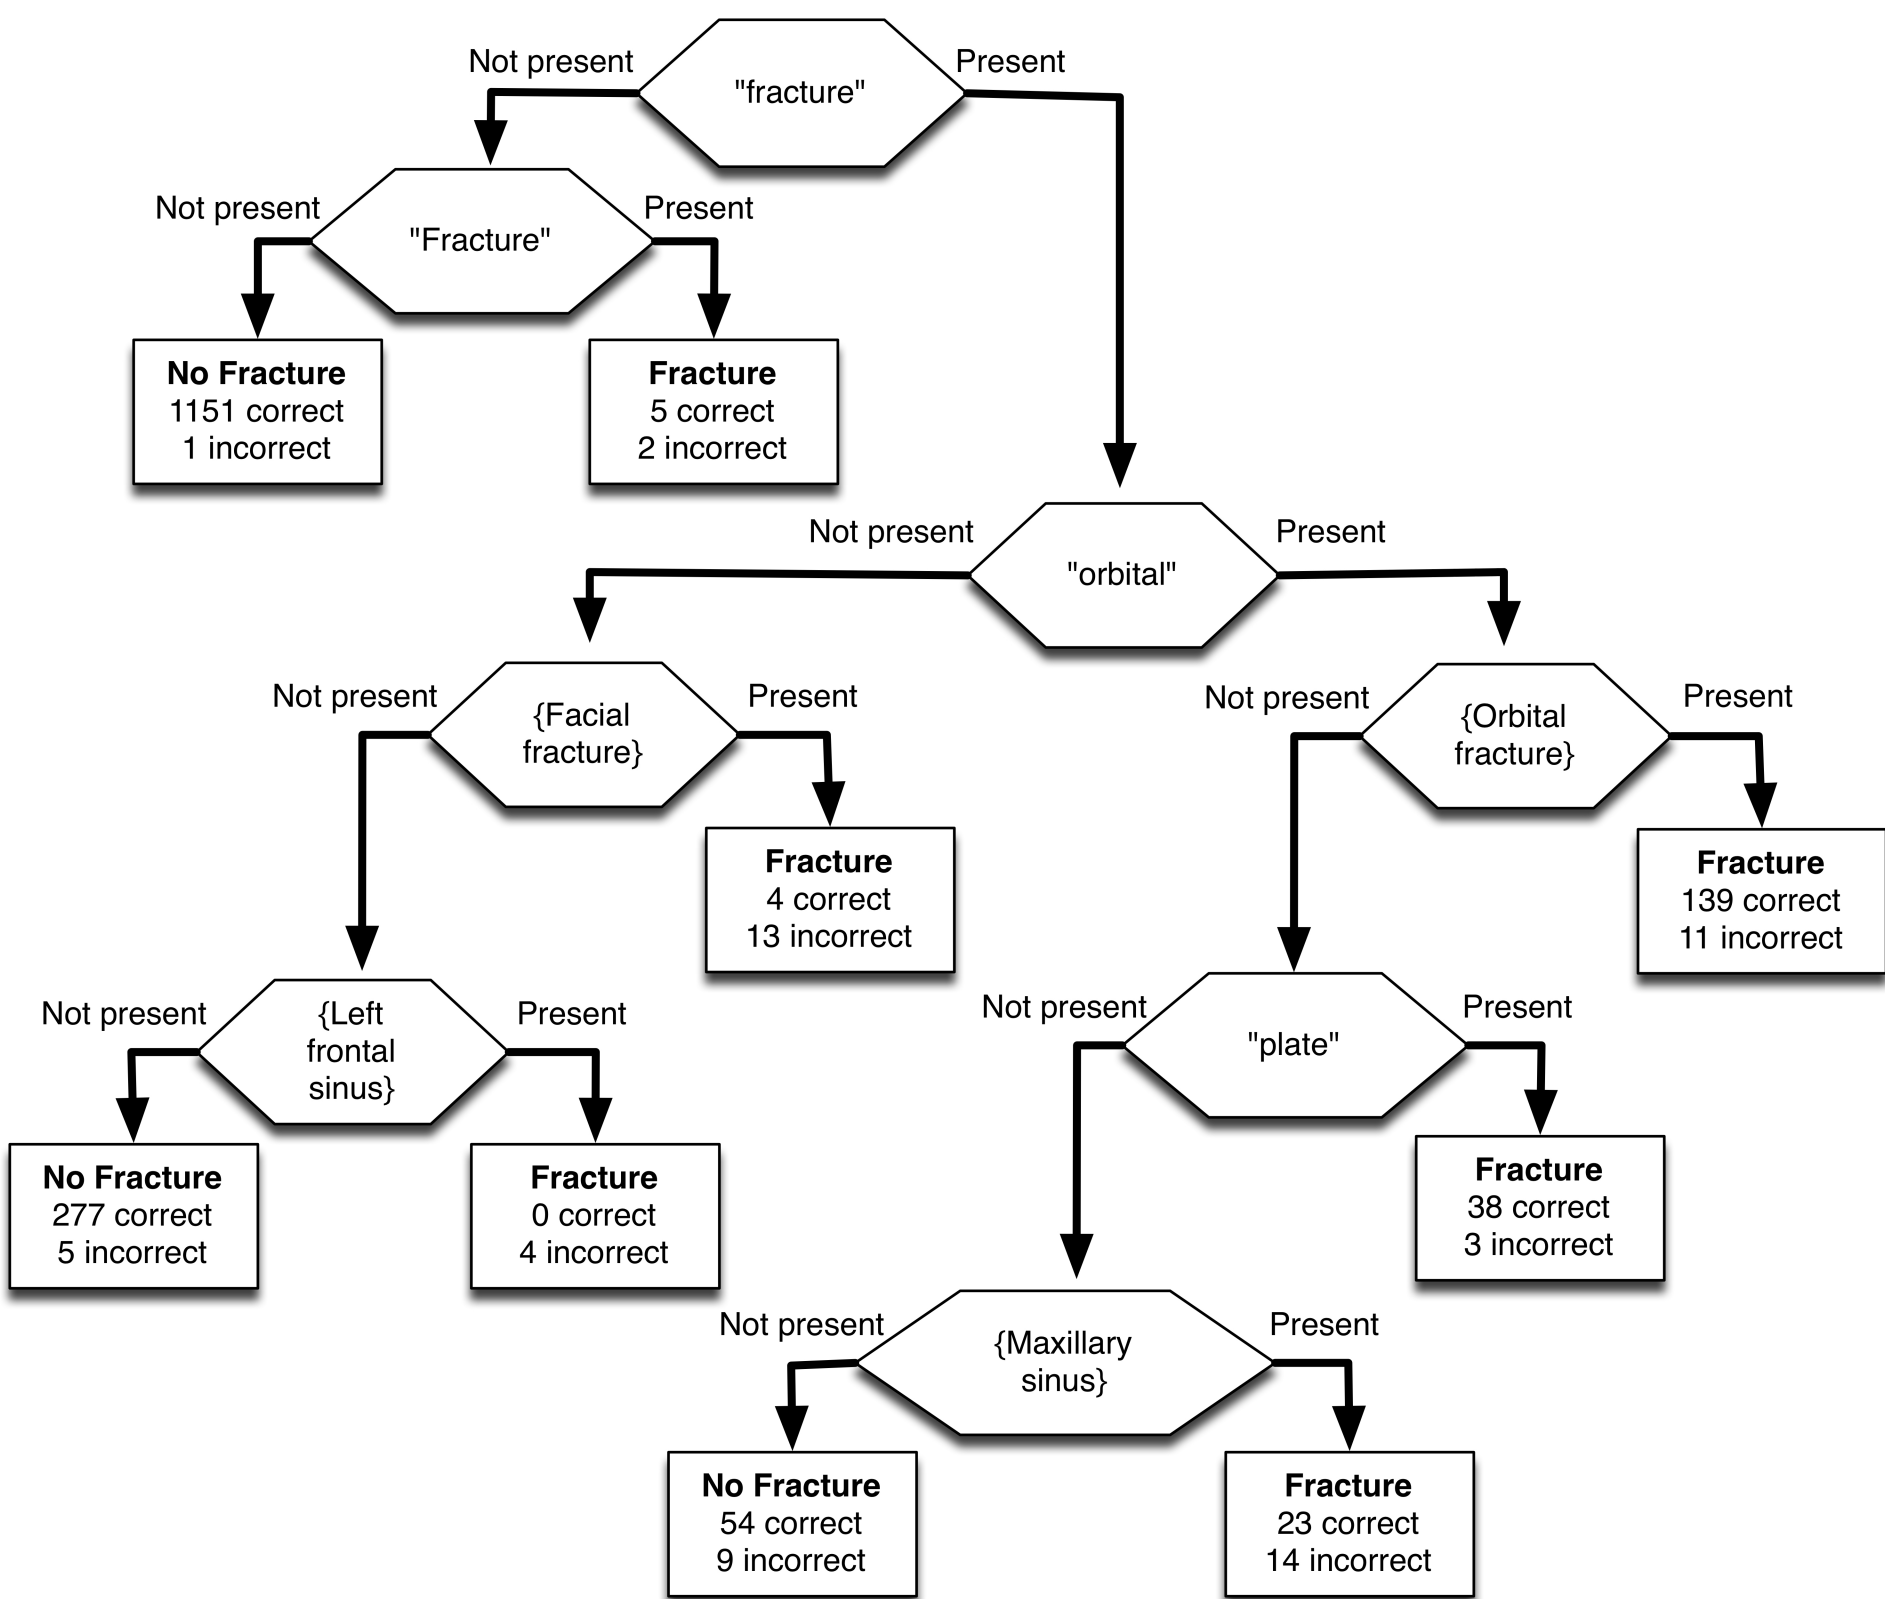

Supplement: NIHMS500374-supplement-Supplementay_Data_S3-S4.pdf [file NIHMS500374-supplement-Supplementay_Data_S3-S4.pdf]
